# Supplementary material for: Inhibition of microRNA-33b specifically ameliorates abdominal aortic aneurysm formation via suppression of inflammatory pathways
Source: PubMed Central journal article supplement (PMC9283493; doi:10.1038/s41598-022-16017-5), 2022-07-14
Supplement: 41598_2022_16017_MOESM1_ESM.pdf [file 41598_2022_16017_MOESM1_ESM.pdf]

## **Supplementary information**

### **Inhibition of MicroRNA-33b Specifically Ameliorates Abdominal Aortic Aneurysm Formation via Suppression of Inflammatory Pathways**

Tomohiro Yamasaki, MD; Takahiro Horie, MD, PhD; Satoshi Koyama, MD, PhD; Tetsushi Nakao, MD, PhD; Osamu Baba, MD, PhD; Masahiro Kimura, MD, PhD; Naoya Sowa, MS; Kazuhisa Sakamoto, MD; Kazuhiro Yamazaki, MD, PhD; Satoshi Obika, PhD; Yuuya Kasahara, PhD; Jun Kotera, PhD; Kozo Oka, PhD; Ryo Fujita, PhD; Takashi Sasaki, PhD; Akihiro Takemiya, PhD; Koji Hasegawa, MD, PhD; Kenji Minatoya, MD, PhD; Takeshi Kimura, MD, PhD; Koh Ono, MD, PhD

**Supplementary Figure S1. Comparison of miR-33 target genes and total amount of miR-33 in miR-33b KI mice primary cells.**

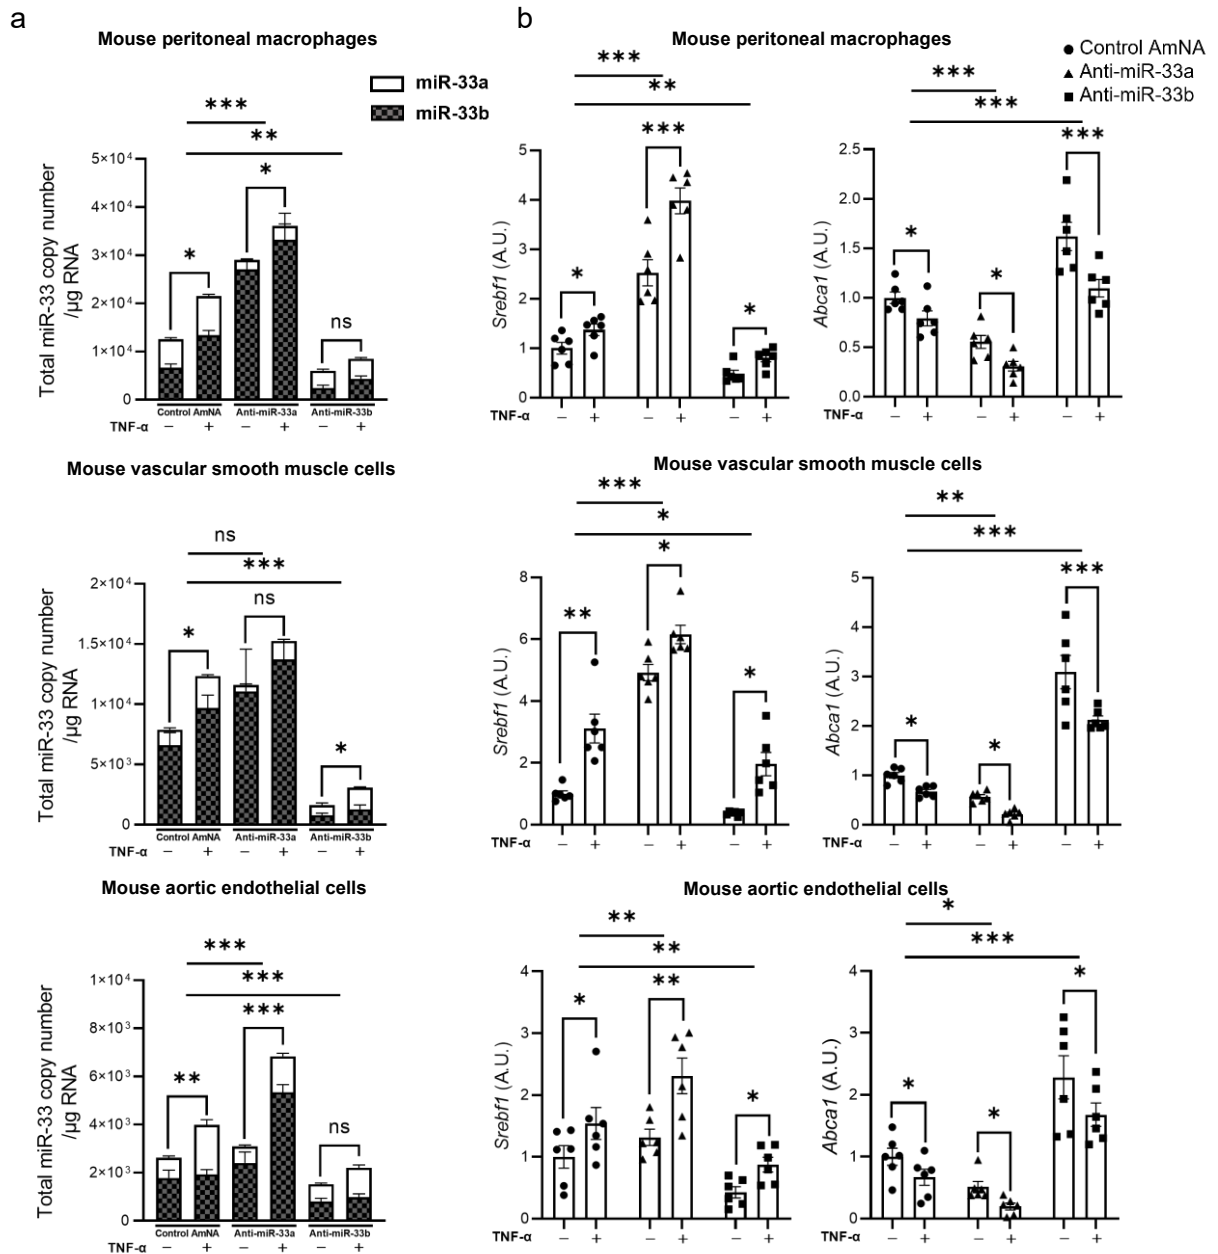

(a) Absolute copy number of miR-33a and miR-33b in miR-33b KI mouse primary cells with or without TNF- $\alpha$  treatment. Two-way ANOVA with Holm-Sidak's multiple comparisons test. \* $P < 0.05$ , \*\* $P < 0.01$  and \*\*\* $P < 0.001$ . ns is defined as not significant.

(b) Expression levels of *Srebf1* and *Abca1* in miR-33b KI mouse primary cells with or without TNF- $\alpha$  treatment determined using quantitative real-time PCR. Two-way ANOVA with Holm-Sidak's multiple comparisons test. \* $P < 0.05$ , \*\* $P < 0.01$  and \*\*\* $P < 0.001$ . All data represent mean  $\pm$  SEM.

Incubation with TNF- $\alpha$  was as follows: 3 hours at 25 ng/mL for mouse P. Ms, 4 hours at 10 ng/mL for mouse VSMCs, and 1 hour at 50 ng/mL for mouse aortic ECs. P. Ms, VSMCs and ECs represent peritoneal macrophages, vascular smooth muscle cells and endothelial cells, respectively.

**Supplementary Figure S2. Comparison of expression levels of total amount of miR-33, ABCA1 and SREBF1 in marginal zone and central zone of human AAA lesions.**

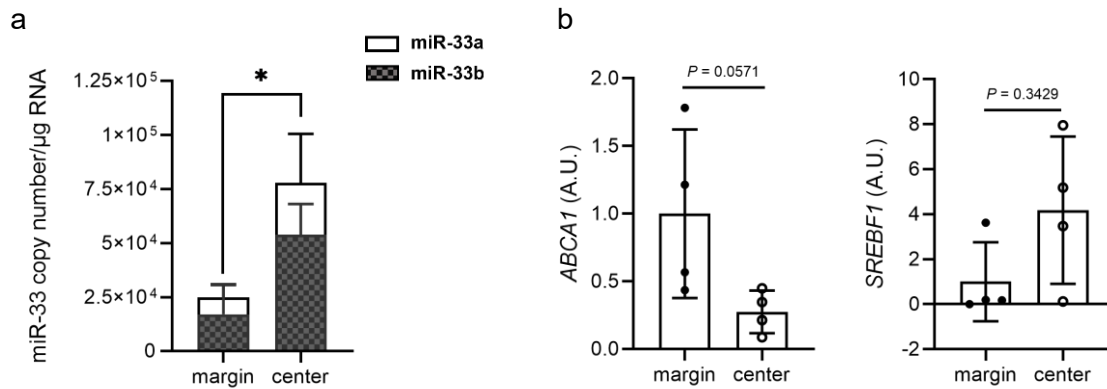

(a) Absolute copy number of miR-33a and miR-33b in marginal zone and central zone of human AAA lesions, n=4. Mann–Whitney test. \*P<0.05.

(b) Expression levels of *ABCA1* and *SREBF1* in marginal zone and central zone of human AAA lesions, n=4. Mann–Whitney test. All data represent mean  $\pm$  SD.

**Supplementary Figure S3. Representative low power-field images of immunofluorescence staining for CD68 (red), MMP9 (green), and DAPI (blue).**

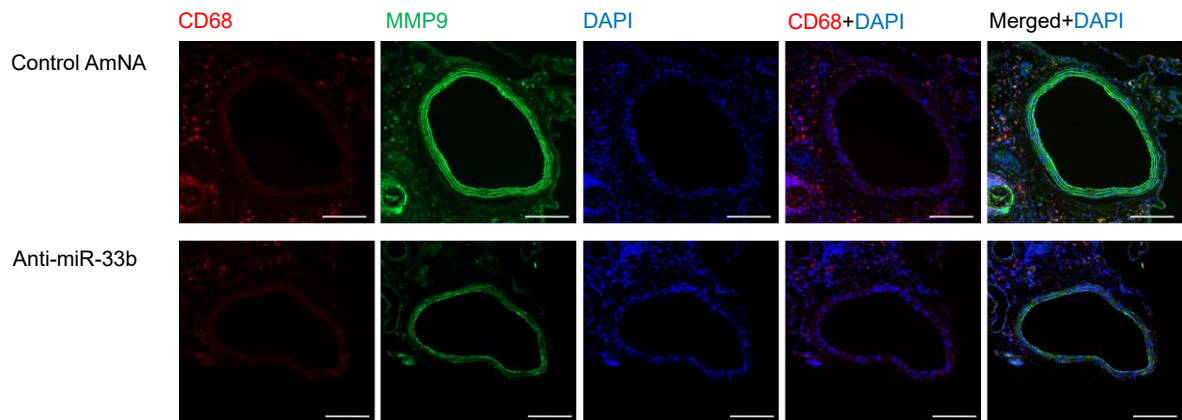

Scale bar indicates 200  $\mu$ m.

Supplementary Figure S4. Scans of the original gel and blots in figure 6d and 6e.

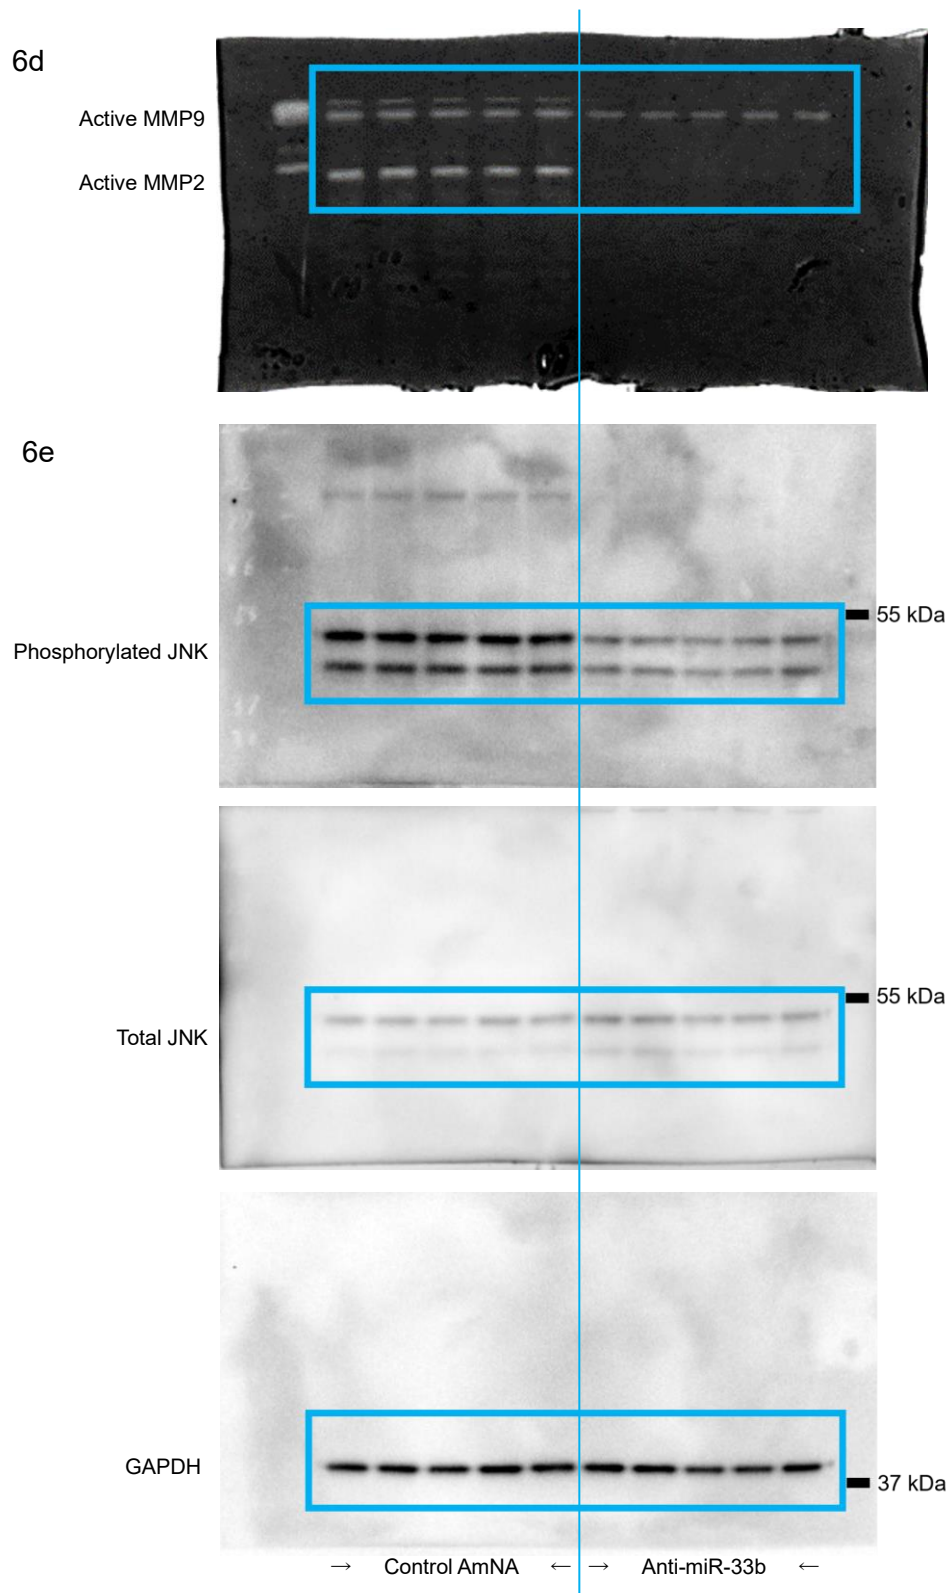

**Supplementary Figure S5. Representative low power-field images of immunofluorescence staining for  $\alpha$ SMA (red), MCP-1 (green), and DAPI (blue).**

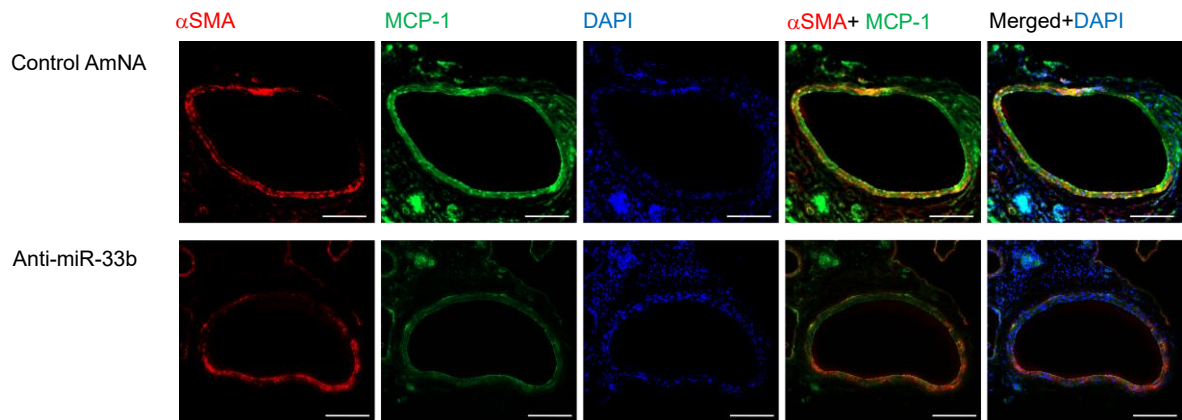

Scale bar indicates 200  $\mu$ m.

**Supplementary Figure S6. Validation of RNA-seq experiments by qPCR.**

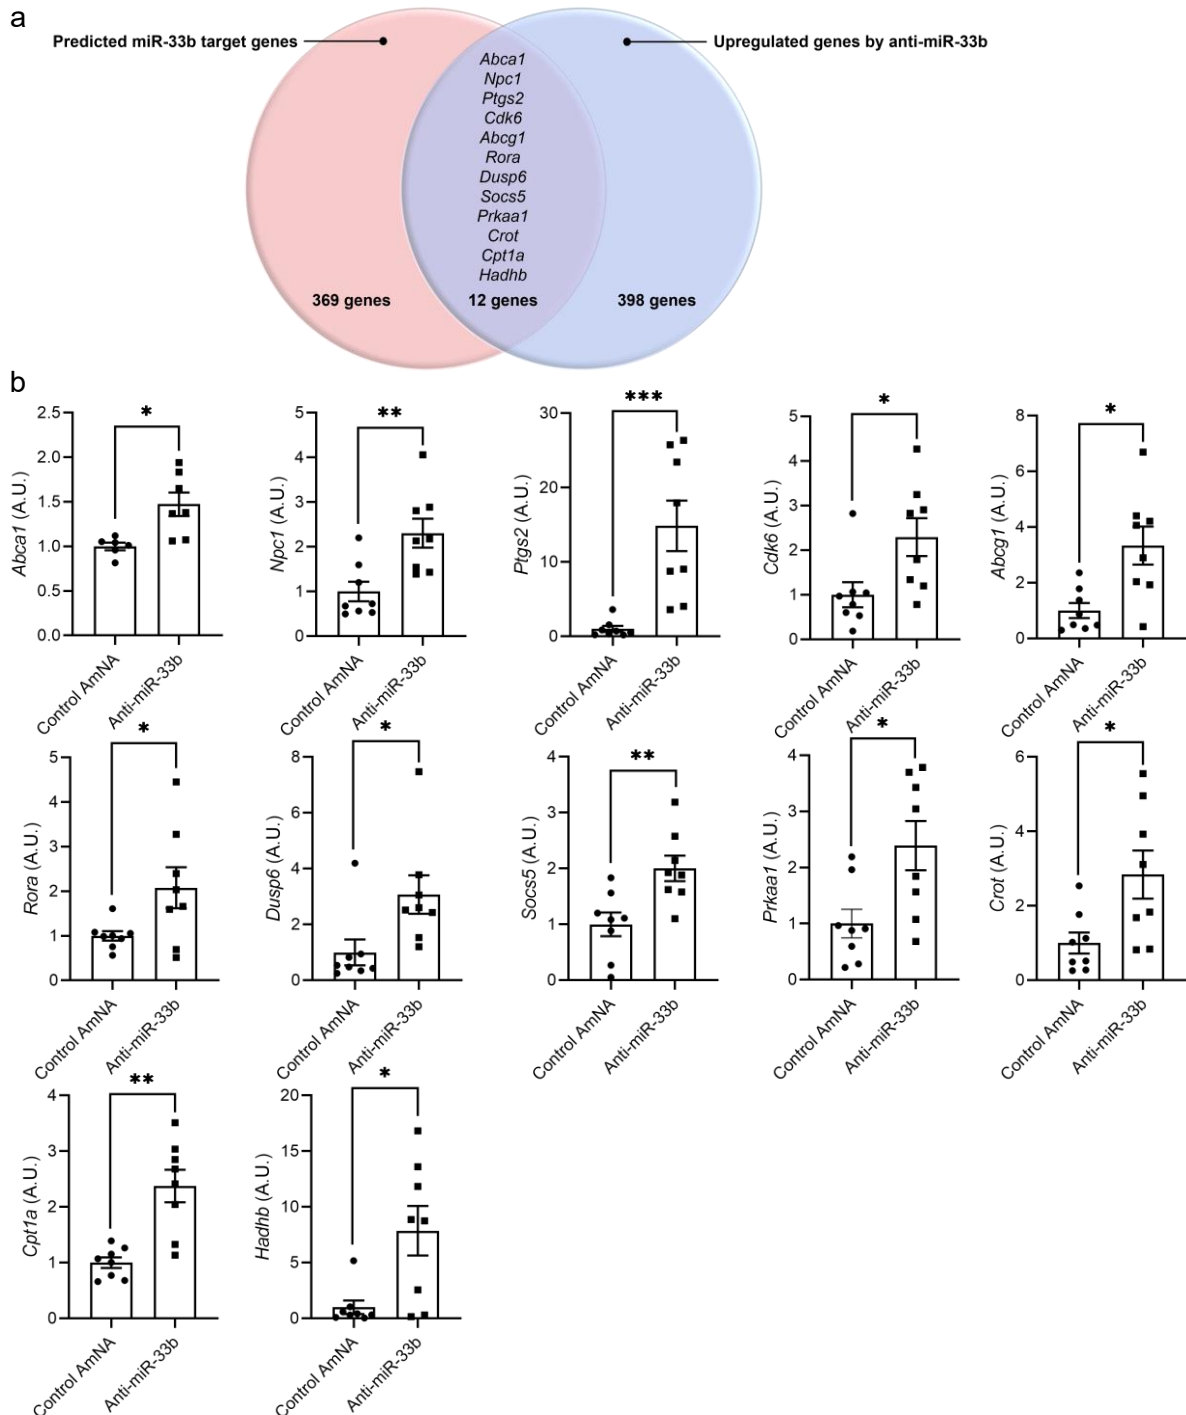

(a) Venn diagram for miR-33b target genes and upregulated genes by anti-miR-33b administration. Predicted miR-33b target genes common to human and mouse were extracted from TargetScanHuman 8.0 ([https://www.targetscan.org/vert\\_80/](https://www.targetscan.org/vert_80/)).

(b) Validation of gene expression overlapped in the Venn diagram, n=8 in each group. Unpaired two-tailed t test (*Abca1*, *Rora*, *Dusp6*, *Socs5*, *Prkaa1* and *Crot*), unpaired t test with Welch's correction (*Npc1*) and Mann–Whitney test (*Ptgs2*, *Cdk6*, *Abcg1*, *Cpt1a* and *Hadhb*). \*P<0.05, \*\*P<0.01 and \*\*\*P<0.001. All data represent mean ± SEM.

**Supplementary Table S1.** Sequences of candidates of AMOs against miR-33a and miR-33b and control oligonucleotides including AmNA.

**Anti-miR-33a oligonucleotides**

---

|           |                                                         |
|-----------|---------------------------------------------------------|
| 33a-1[12] | A(Y)^c^T(Y)^a^5(Y)^a^A(Y)^t^G(Y)^c^A(Y)^c               |
| 33a-1[14] | 5(Y)^a^A(Y)^c^T(Y)^a^5(Y)^a^A(Y)^t^G(Y)^c^A(Y)^c        |
| 33a-1[16] | T(Y)^g^5(Y)^a^A(Y)^c^T(Y)^a^5(Y)^a^A(Y)^t^G(Y)^c^A(Y)^c |
| 33a-2[12] | A(Y)^a^5(Y)^t^A(Y)^c^A(Y)^a^T(Y)^g^5(Y)^a               |
| 33a-2[14] | G(Y)^c^A(Y)^a^5(Y)^t^A(Y)^c^A(Y)^a^T(Y)^g^5(Y)^a        |
| 33a-2[16] | A(Y)^t^G(Y)^c^A(Y)^a^5(Y)^t^A(Y)^c^A(Y)^a^T(Y)^g^5(Y)^a |

---

**Anti-miR-33b oligonucleotides**

---

|           |                                                         |
|-----------|---------------------------------------------------------|
| 33b-1[12] | A(Y)^c^A(Y)^g^5(Y)^a^A(Y)^t^G(Y)^c^A(Y)^c               |
| 33b-1[14] | 5(Y)^a^A(Y)^c^A(Y)^g^5(Y)^a^A(Y)^t^G(Y)^c^A(Y)^c        |
| 33b-1[16] | T(Y)^g^5(Y)^a^A(Y)^c^A(Y)^g^5(Y)^a^A(Y)^t^G(Y)^c^A(Y)^c |
| 33b-2[12] | A(Y)^a^5(Y)^a^G(Y)^c^A(Y)^a^T(Y)^g^5(Y)^a               |
| 33b-2[14] | G(Y)^c^A(Y)^a^5(Y)^a^G(Y)^c^A(Y)^a^T(Y)^g^5(Y)^a        |
| 33b-2[16] | A(Y)^t^G(Y)^c^A(Y)^a^5(Y)^a^G(Y)^c^A(Y)^a^T(Y)^g^5(Y)^a |

---

**Control AmNA**

---

A(Y)^a^5(Y)^a^A(Y)^t^A(Y)^c^T(Y)^a^5(Y)^g

---

Lower case, N(Y), 5(Y) and ^ indicate deoxyribonucleic acid, amido-bridged nucleic acids (AmNA), 5-methylcytosine AmNA, and phosphorothioate internucleotide linkage, respectively.



**Supplementary Table S2.** Used gene-specific oligonucleotide primer sequences.

| <b>Gene</b>     | <b>Species</b> | <b>Forward/Reverse</b>                                      |
|-----------------|----------------|-------------------------------------------------------------|
| <i>Srebf1</i>   | Mouse          | 5'-TAGAGCATATCCCCCAGGTG-3'/5'-GGTACGGGCCACAAGAAGTA-3'       |
| <i>Srebf2</i>   | Mouse          | 5'-GTGGAGCAGTCTCAACGTCA-3'/5'-TGGTAGGTCTCACCCAGGAG-3'       |
| <i>Abca1</i>    | Mouse          | 5'-AACAGTTTGTGGCCCTTTTG-3'/5'-AGTTCAGGCTGGGGTACTT-3'        |
| <i>Mmp9</i>     | Mouse          | 5'-TCACACGACATCTTCCAGTACC-3'/5'-CACCTCATTTTGGAAACTCACA-3'   |
| <i>Mcp-1</i>    | Mouse          | 5'-CTGGATCGGAACCAAATGAG-3'/5'-TGAGGTGGTTGTGGAAAAGG-3'       |
| <i>Jnk1</i>     | Mouse          | 5'-GCTGTGTGGAATCAAGCACC-3'/5'-AGCGAGTCACCACATAAGGC-3'       |
| <i>Tnfa</i>     | Mouse          | 5'-CCAGACCCTCACACTCAGATC-3'/5'-CACTTGGTGGTTTGCTACGAC-3'     |
| <i>Il1b</i>     | Mouse          | 5'-TCAGGCAGGCAGTATCACTCA-3'/5'-GGAAGGTCCACGGGAAAGAC-3'      |
| <i>Il6</i>      | Mouse          | 5'-ACCACGGCCTCCCTACTTC-3'/5'-AGATTGTTTCTGCAAGTGCATCA-3'     |
| <i>Arg1</i>     | Mouse          | 5'-AACTCTTGGGAAGACAGCAGAG-3'/5'-GTAGTCAGTCCCTGGCTTATGG-3'   |
| <i>Crot</i>     | Mouse          | 5'-TACTTTTACCACGGCCGAAC-3'/5'-GACGGTCAAATCCTTTTCCA-3'       |
| <i>Prkaa1</i>   | Mouse          | 5'-AGAGGGCCGCAATAAAAGAT-3'/5'-TGTTGTACAGGCAGCTGAGG-3'       |
| <i>Npc1</i>     | Mouse          | 5'-ACTCTTGTGTGGGAGGGATG-3'/5'-AGCAGTCCTGGCAGCTACAT-3'       |
| <i>Ptgs2</i>    | Mouse          | 5'-GCGAGCTAAGAGCTTCAGGA-3'/5'-TCATACATTCCCCACGGTTT-3'       |
| <i>Pck1</i>     | Mouse          | 5'-CTGGCACCTCAGTGAAGACA-3'/5'-TCGATGCCTTCCCAGTAAAC-3'       |
| <i>Cpt1a</i>    | Mouse          | 5'-GATCTACAATTCCCCTCTGCTCT-3'/5'-TAGAGCCAGACCTTGAAGTAACG-3' |
| <i>Ppargc1a</i> | Mouse          | 5'-ATCACGTTCAAGGTCACCCTAC-3'/5'-GCTTCTGCCTCTCTCTCTGTTT-3'   |
| <i>Abcg1</i>    | Mouse          | 5'-GTACCATGACATCGCTGGTG-3'/5'-AGCCGTAGATGGACAGGATG-3'       |
| <i>Hadhb</i>    | Mouse          | 5'-GAGCTGTTCTTCCCAACTGC-3'/5'-AACCCGAAAGTGCAGCTCTA-3'       |
| <i>Rora</i>     | Mouse          | 5'-ACGCCCACCTACAACATCTC-3'/5'-TCACATATGGGTTCGGGTTT-3'       |
| <i>Dusp6</i>    | Mouse          | 5'-GAATAATCCGGCGAGAAACA-3'/5'-AATGAAGGTGCCAGTTTTG-3'        |
| <i>Socs5</i>    | Mouse          | 5'-GTAAAAGCCCCAGTGTGCAT-3'/5'-CTGGGCATCTCCTAGTCTCG-3'       |
| <i>Aldh1a2</i>  | Mouse          | 5'-TTGCAGATGCTGACTTGGAC-3'/5'-TCTGAGGACCCTGCTCAGTT-3'       |
| <i>Pdk4</i>     | Mouse          | 5'-GCCTTGGGAGAAATGTGTGT-3'/5'-GAAGGCACTGGCTTTTTGAG-3'       |
| <i>Cdk6</i>     | Mouse          | 5'-TGTTTCAGCTTCTCCGAGGT-3'/5'-CTGGACTGGAGCAGGACTTC-3'       |
| <i>Rn18s</i>    | Mouse          | 5'-CGCGGTTCTATTTTGTGGT-3'/5'-AGTCGGCATCGTTTATGGTC-3'        |
| <i>SREBF1</i>   | Human          | 5'-AACAGTCCCCTGGTCGTAGAT-3'/5'-TGTTGCAGAAAGCGAATGTAGT-3'    |
| <i>ABCA1</i>    | Human          | 5'-GTCCTCCCGCATTATCTGG-3'/5'-AGTTCCTGGAAGGTCTTGTTTAC-3'     |
| <i>ACTB</i>     | Human          | 5'-AGGCACTCTTCCAGCCTTCC-3'/5'-GCACTGTGTTGGCGTACAGG-3'       |
